# Supplementary material
Source: publisher figshare collection journal article supplement (https://tandf.figshare.com/articles/dataset/_/24903232)
Supplement: Supplementary file 2 [file 1]

Archive with 4 entries (4 files):
- Latex project supplementary materials.zip
- Supplementary Material_Using_Knowledge.pdf
- concept_map_V2.png
- short-video-comap-tool.mp4
